# Supplementary material
Source: MDPI journal article supplement (https://www.mdpi.com/1999-4907/14/5/896)
Supplement: s1 [file s1]

## Supplementary Materials

**Figure S1.** Sampling points from 25 countries.

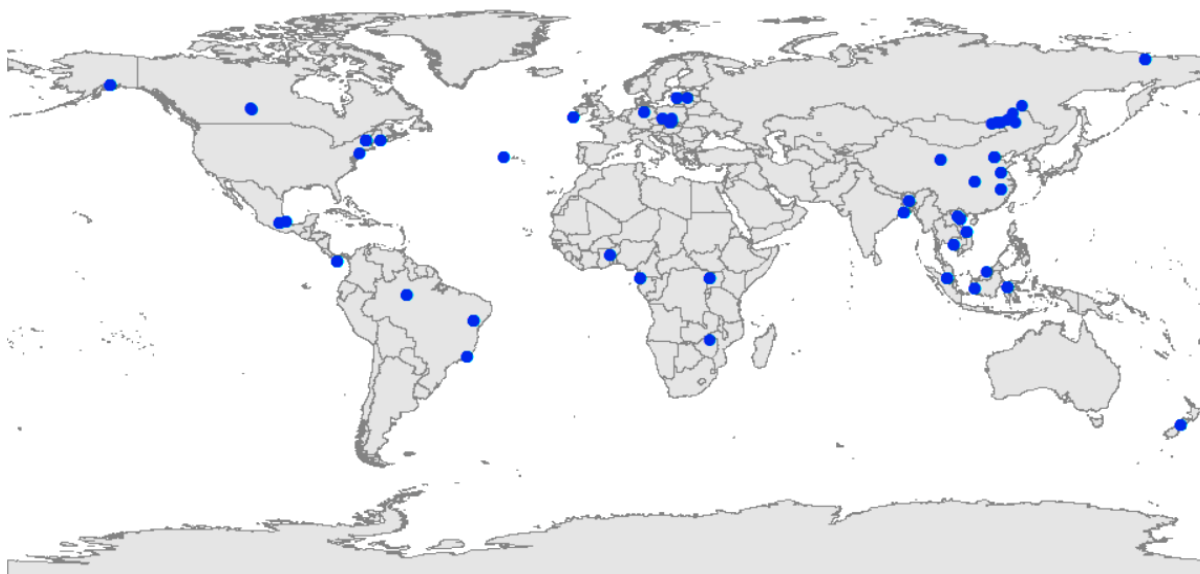

**Table S1.** Datasets from 25 countries.

| Country | Location       | MAT  | MAP  | Tree Density | DBH   | Basal Area           | AGB     |
|---------|----------------|------|------|--------------|-------|----------------------|---------|
|         |                | (°C) | (mm) | (trees/ha)   | (cm)  | (m <sup>2</sup> /ha) | (Mg/ha) |
| Mexico  | Veracruz       | 23.3 | 946  | 520          | 20.7  | 24.8                 | 188.7   |
| Mexico  | Veracruz       | 23.3 | 1147 | 830          | 20.9  | 49.3                 | 398.4   |
| Mexico  | Veracruz       | 12.1 | 1077 | 1015         | 23.4  | 51.9                 | 353.5   |
| Mexico  | Veracruz       | 9.7  | 1478 | 1800         | 18.3  | 48.2                 | 175.6   |
| India   | Assam          | 14.6 | 3144 | 1630         | 77.7  | 24.9                 | 125.4   |
| India   | Assam          | 14.6 | 3144 | 995          | 119.1 | 23.0                 | 120.2   |
| India   | Assam          | 14.6 | 3144 | 920          | 98.6  | 16.2                 | 115.4   |
| Canada  | Venables       | 3.5  | 403  | 233          | —     | 35.1                 | 419.0   |
| Canada  | Two-bit Creek  | 7.7  | 653  | 332          | —     | 42.0                 | 456.8   |
| Canada  | Peterhope Lake | 4.1  | 398  | 188          | —     | 24.3                 | 285.6   |
| Canada  | Jaffray        | 5.3  | 618  | 297          | —     | 35.6                 | 352.8   |
| Canada  | Redfish Creek  | 6.8  | 868  | 206          | —     | 50.0                 | 609.6   |
| Canada  | Alex Fraser    | 4.4  | 532  | 357          | —     | 40.3                 | 435.6   |
| Canada  | John Prince    | 2.3  | 593  | 411          | —     | 53.8                 | 642.2   |
| Canada  | Narrows Creek  | 5.1  | 1059 | 494          | —     | 58.0                 | 781.6   |
| Canada  | Malcolm Knapp  | 8    | 2701 | 320          | —     | 79.1                 | 970.6   |
| Germany | North plain    | 9.1  | 691  | 252          | 41.8  | 29.1                 | 147.2   |
| Germany | North plain    | 9.1  | 693  | 406          | 31.0  | 27.5                 | 86.8    |
| Germany | North plain    | 9.1  | 692  | 541          | 26.4  | 28.1                 | 72.0    |

|         |         |     |      |      |      |      |       |
|---------|---------|-----|------|------|------|------|-------|
| Latvia  | –       | 5   | 700  | 676  | 33.1 | 45.3 | 271.6 |
| America | Vermont | 5.4 | 1082 | 163  | 13.8 | 8.9  | 128.6 |
| America | Vermont | 5.5 | 1074 | 189  | 10.4 | 14.2 | 123.4 |
| America | Vermont | 5.8 | 1047 | 229  | 12.7 | 9.3  | 155.4 |
| America | Vermont | 3.7 | 1339 | 123  | 11.5 | 12.8 | 186.8 |
| America | Vermont | 5.5 | 1095 | 558  | 24.1 | 6.7  | 217.6 |
| America | Vermont | 5.7 | 1078 | 72   | 13.8 | 6.0  | 161.8 |
| America | Vermont | 6.5 | 1069 | 163  | 11.5 | 11.0 | 160.8 |
| America | Vermont | 6.5 | 1069 | 156  | 6.9  | 7.3  | 94.0  |
| America | Vermont | 5.7 | 1162 | 349  | 15.0 | 8.8  | 145.0 |
| America | Vermont | 5.7 | 1162 | 254  | 23.0 | 9.3  | 235.2 |
| America | Vermont | 4.7 | 1196 | 215  | 17.3 | 8.6  | 233.6 |
| America | Vermont | 4.6 | 1201 | 248  | 23.0 | 10.3 | 285.6 |
| America | Vermont | 5.1 | 1145 | 176  | 19.5 | 8.5  | 211.4 |
| America | Vermont | 5.6 | 1158 | 103  | 23.0 | 12.1 | 273.6 |
| America | Vermont | 5.4 | 1185 | 414  | 20.7 | 8.2  | 206.0 |
| America | Vermont | 6   | 1068 | 131  | 10.4 | 14.3 | 136.2 |
| America | Vermont | 6.3 | 1018 | 500  | 8.1  | 4.8  | 87.4  |
| America | Vermont | 6.3 | 1060 | 175  | 17.3 | 12.2 | 185.2 |
| America | Vermont | 6   | 1109 | 712  | 23.0 | 9.8  | 228.8 |
| America | Vermont | 6   | 996  | 339  | 13.8 | 8.5  | 173.4 |
| America | Vermont | 5.9 | 1027 | 383  | 13.8 | 6.4  | 159.6 |
| America | Vermont | 4.2 | 1189 | 262  | 18.4 | 7.3  | 224.0 |
| America | Vermont | 4.5 | 1115 | 335  | 13.8 | 10.9 | 210.0 |
| America | Vermont | 4.4 | 1146 | 166  | 19.5 | 8.2  | 241.8 |
| America | Vermont | 5.8 | 1117 | 174  | 8.1  | 9.2  | 130.2 |
| America | Vermont | 5.8 | 1117 | 431  | 11.5 | 6.1  | 122.8 |
| America | Vermont | 5.4 | 1131 | 357  | 17.2 | 10.3 | 228.0 |
| America | Vermont | 5.4 | 1131 | 1146 | 11.5 | 8.1  | 140.0 |
| America | Vermont | 5.6 | 1098 | 778  | 15.0 | 3.8  | 133.6 |
| America | Vermont | 5.6 | 1098 | 109  | 10.4 | 5.7  | 129.6 |
| America | Vermont | 6   | 1137 | 1496 | 13.8 | 4.6  | 136.8 |
| America | Vermont | 5.8 | 1170 | 292  | 11.5 | 8.6  | 129.2 |
| America | Vermont | 4.7 | 1181 | 683  | 19.5 | 8.2  | 191.4 |
| America | Vermont | 4.3 | 1248 | 75   | 10.4 | 8.1  | 164.8 |
| America | Vermont | 4.3 | 1246 | 174  | 15.0 | 7.7  | 158.2 |
| America | Vermont | 5.6 | 1192 | 285  | 20.7 | 8.7  | 254.4 |
| America | Vermont | 5.7 | 1167 | 261  | 9.2  | 9.1  | 119.4 |
| America | Vermont | 5.4 | 1085 | 157  | 19.5 | 8.9  | 232.4 |

|                   |                |       |      |       |      |      |       |
|-------------------|----------------|-------|------|-------|------|------|-------|
| America           | Vermont        | 5.2   | 1109 | 209   | 19.5 | 7.9  | 213.8 |
| America           | Vermont        | 6.1   | 1121 | 51    | 10.4 | 15.1 | 192.4 |
| America           | Vermont        | 6.1   | 1121 | 275   | 12.7 | 12.0 | 180.8 |
| America           | Vermont        | 4.9   | 1172 | 57    | 12.7 | 6.4  | 210.4 |
| America           | Vermont        | 4.9   | 1172 | 79    | 12.7 | 9.9  | 204.8 |
| America           | Vermont        | 3.7   | 1347 | 170   | 14.9 | 9.2  | 205.6 |
| America           | Vermont        | 3.6   | 1345 | 267   | 12.7 | 11.0 | 144.4 |
| America           | Vermont        | 7     | 1040 | 610   | 34.4 | 41.6 | 206.1 |
| America           | Vermont        | 8     | 920  | 800   | 26.1 | 34.2 | 190.7 |
| America           | New York       | 5     | 1079 | 744   | 28.0 | 35.0 | 213.8 |
| America           | Vermont        | 5     | 1410 | 709   | 19.3 | 21.5 | 109.1 |
| America           | Vermont        | 7     | 1040 | 677   | 27.3 | 27.6 | 127.3 |
| America           | Vermont        | 8     | 920  | 1190  | 20.2 | 28.5 | 150.6 |
| America           | New York       | 5     | 1079 | 729   | 28.0 | 35.8 | 212.9 |
| Brazil            | Bahia          | 24    | 2000 | 197   | 23.0 | —    | 164.0 |
| Brazil            | Bahia          | 24    | 2000 | 65    | 38.0 | —    | 84.0  |
| Brazil            | Bahia          | 24    | 2000 | 898   | 16.0 | —    | 366.0 |
| Brazil            | Bahia          | 24    | 2000 | 840   | 16.0 | —    | 204.0 |
| Brazil            | Bahia          | 24    | 2000 | 596   | 14.0 | —    | 66.0  |
| Germany           | Brocken        | 2.9   | 1600 | 3568  | 19.5 | 24.8 | 84.0  |
| Germany           | Brocken        | 2.9   | 1600 | 1267  | 18.7 | 23.3 | 82.0  |
| Germany           | Brocken        | 2.9   | 1600 | 662   | 28.6 | 37.8 | 366.0 |
| Germany           | Brocken        | 2.9   | 1600 | 1273  | 35.2 | 48.5 | 428.0 |
| Germany           | Brocken        | 2.9   | 1600 | 1310  | 44.6 | 96.7 | 406.0 |
| Brunei Darussalam | Kuala Belalong | 30.1  | 4582 | 6914  | —    | 44.6 | 524.5 |
| Mexico            | Chiapas        | 24    | 1600 | 338   | —    | 14.6 | 105.2 |
| Mexico            | Chiapas        | 24    | 1600 | 538   | —    | 13.0 | 94.4  |
| Mexico            | Chiapas        | 24    | 1600 | 331   | —    | 20.6 | 169.5 |
| Mexico            | Chiapas        | 24    | 1600 | 613   | —    | 17.1 | 119.6 |
| Mexico            | Chiapas        | 24    | 1600 | 419   | —    | 26.7 | 214.5 |
| Mexico            | Chiapas        | 24    | 1600 | 769   | —    | 21.6 | 148.6 |
| Ecuador           | Napo           | 23    | 4119 | 576   | 21.8 | 27.4 | 246.8 |
| Ecuador           | Napo           | 23    | 4119 | 676   | 22.1 | 34.1 | 320.9 |
| Ecuador           | Napo           | 23    | 4119 | 772   | 20.7 | 34.5 | 307.1 |
| Ecuador           | Napo           | 23    | 4119 | 732   | 20.5 | 31.2 | 291.9 |
| Vietnam           | Thai Binh      | 24.15 | 1770 | 12167 | 7.4  | —    | 15.4  |
| Vietnam           | Thai Binh      | 24.15 | 1770 | 13333 | 6.7  | —    | 14.9  |
| Vietnam           | Thai Binh      | 24.15 | 1770 | 10067 | 8.7  | —    | 21.0  |

|          |                |       |      |       |      |      |       |
|----------|----------------|-------|------|-------|------|------|-------|
| Vietnam  | Thai Binh      | 24.15 | 1770 | 22575 | 5.3  | —    | 33.8  |
| Vietnam  | Thai Binh      | 24.15 | 1770 | 26500 | 5.4  | —    | 38.0  |
| Vietnam  | Thai Binh      | 24.15 | 1770 | 26400 | 5.7  | —    | 42.8  |
| Vietnam  | Nam Dinh       | 24.15 | 1770 | 20633 | 5.0  | —    | 111.0 |
| Vietnam  | Nam Dinh       | 24.15 | 1770 | 20067 | 5.2  | —    | 115.4 |
| Vietnam  | Nam Dinh       | 24.15 | 1770 | 17367 | 5.7  | —    | 111.9 |
| Panama   | Veraguas       | 27    | 2800 | 1521  | 7.4  | 4.3  | 17.9  |
| Panama   | Veraguas       | 27    | 2800 | 919   | 18.9 | 11.8 | 159.2 |
| Panama   | Veraguas       | 27    | 2800 | 381   | 16.0 | 5.3  | 40.6  |
| Panama   | Veraguas       | 27    | 2800 | 1408  | 15.5 | 6.0  | 25.4  |
| Panama   | Veraguas       | 27    | 2800 | 2188  | 16.7 | 9.3  | 67.8  |
| Panama   | Veraguas       | 27    | 2800 | 2625  | 10.9 | 5.8  | 19.1  |
| Panama   | Veraguas       | 27    | 2800 | 858   | 11.5 | 5.1  | 43.1  |
| Panama   | Veraguas       | 27    | 2800 | 563   | 14.1 | 5.5  | 44.1  |
| Panama   | Veraguas       | 27    | 2800 | 200   | 13.1 | 2.3  | 27.3  |
| China    | Hubei          | 10.6  | 1514 | 540   | —    | 13.0 | 66.9  |
| China    | Hubei          | 10.6  | 1514 | 750   | —    | 25.7 | 139.8 |
| China    | Hubei          | 10.6  | 1514 | 1065  | —    | 39.1 | 219.7 |
| Brazil   | Rio de Janeiro | 17.8  | 2821 | 3150  | 10.9 | 42.6 | 369.2 |
| Brazil   | Rio de Janeiro | 17.8  | 2821 | 2500  | 13.8 | 66.4 | 663.5 |
| Brazil   | Rio de Janeiro | 17.8  | 2821 | 2300  | 10.9 | 34.0 | 276.4 |
| Benin    | Djougou        | 28    | 1200 | 286   | 35.8 | 17.9 | 86.0  |
| Benin    | Djougou        | 28    | 1200 | 247   | 31.3 | 11.5 | 66.1  |
| Benin    | Djougou        | 28    | 1200 | 224   | 31.5 | 9.1  | 50.6  |
| China    | Gansu          | 0.5   | 368  | 957   | 7.7  | —    | 42.0  |
| China    | Gansu          | 0.5   | 368  | 1215  | 7.2  | —    | 38.8  |
| China    | Gansu          | 0.5   | 368  | 1161  | 7.0  | —    | 30.8  |
| Vietnam  | Ta Dung        | 22.5  | 2513 | 199   | —    | 2.2  | 8.2   |
| Vietnam  | Ta Dung        | 22.5  | 2513 | 274   | —    | 4.3  | 21.4  |
| Vietnam  | Ta Dung        | 22.5  | 2513 | 262   | —    | 9.5  | 76.9  |
| Vietnam  | —              | 18.1  | 1768 | 629   | —    | 34.9 | 260.9 |
| Vietnam  | —              | 18.4  | 1836 | 471   | —    | 25.7 | 199.0 |
| Vietnam  | —              | 20.1  | 1964 | 329   | —    | 31.1 | 241.0 |
| Vietnam  | —              | 21.8  | 2052 | 542   | —    | 39.0 | 320.2 |
| Vietnam  | —              | 18.9  | 1924 | 495   | —    | 28.9 | 214.9 |
| Vietnam  | —              | 21.9  | 1804 | 533   | —    | 29.4 | 224.4 |
| Malaysia | Melaka         | 31    | 2000 | 3538  | 18.1 | 10.7 | 127.6 |
| Malaysia | Melaka         | 31    | 2000 | 3453  | 10.5 | 9.8  | 75.6  |
| Malaysia | Melaka         | 31    | 2000 | 3921  | 8.1  | 9.2  | 49.3  |

|            |              |      |      |       |      |      |       |
|------------|--------------|------|------|-------|------|------|-------|
| Malaysia   | Melaka       | 31   | 2000 | 3222  | 11.6 | 9.6  | 66.0  |
| Malaysia   | Melaka       | 31   | 2000 | 3118  | 12.7 | 8.6  | 69.7  |
| Malaysia   | Melaka       | 31   | 2000 | 6565  | 4.0  | 5.8  | 37.8  |
| China      | Jiangsu      | 14   | 867  | 796   | 18.4 | 31.7 | 26.3  |
| China      | Jiangsu      | 14   | 867  | 540   | 18.4 | 48.3 | 45.8  |
| China      | Jiangsu      | 14   | 867  | 423   | 21.3 | 58.0 | 53.1  |
| America    | Alaska       | -3   | 260  | 49000 | 1.1  | 6.2  | 67.5  |
| America    | Alaska       | -3   | 260  | 30000 | 1.4  | 7.1  | 122.0 |
| America    | Alaska       | -3   | 260  | 71000 | 1.4  | 9.4  | 141.0 |
| America    | Alaska       | -3   | 260  | 37000 | 2.0  | 12.2 | 270.6 |
| America    | Alaska       | -3   | 260  | 26000 | 2.8  | 20.2 | 518.1 |
| Bangladesh | Sundarbans   | 24   | 1800 | 8083  | 3.9  | 17.6 | 115.8 |
| Bangladesh | Sundarbans   | 24   | 1800 | 7616  | 5.2  | 35.6 | 300.2 |
| Bangladesh | Sundarbans   | 24   | 1800 | 8516  | 4.1  | 21.2 | 146.7 |
| Bangladesh | Sundarbans   | 24   | 1800 | 8304  | 5.5  | 43.4 | 389.3 |
| Bangladesh | Sundarbans   | 24   | 1800 | 7801  | 5.5  | 42.0 | 357.5 |
| Bangladesh | Sundarbans   | 24   | 1800 | 22595 | 4.4  | 49.0 | 221.7 |
| Bangladesh | Sundarbans   | 24   | 1800 | 23216 | 4.7  | 58.7 | 298.4 |
| Bangladesh | Sundarbans   | 24   | 1800 | 22883 | 4.8  | 60.8 | 300.8 |
| Bangladesh | Sundarbans   | 24   | 1800 | 7683  | 4.2  | 25.0 | 225.8 |
| Bangladesh | Sundarbans   | 24   | 1800 | 9103  | 4.9  | 30.7 | 205.4 |
| Bangladesh | Sundarbans   | 24   | 1800 | 10350 | 4.6  | 27.0 | 140.2 |
| Bangladesh | Sundarbans   | 24   | 1800 | 3350  | 8.5  | 29.4 | 271.8 |
| Bangladesh | Sundarbans   | 24   | 1800 | 4767  | 6.4  | 32.0 | 277.5 |
| Bangladesh | Sundarbans   | 24   | 1800 | 4666  | 6.5  | 31.6 | 280.8 |
| Bangladesh | Sundarbans   | 24   | 1800 | 7867  | 3.7  | 21.9 | 180.5 |
| Bangladesh | Sundarbans   | 24   | 1800 | 9196  | 3.6  | 25.0 | 196.6 |
| Bangladesh | Sundarbans   | 24   | 1800 | 7117  | 3.6  | 21.1 | 172.6 |
| Bangladesh | Sundarbans   | 24   | 1800 | 8317  | 4.0  | 19.4 | 131.9 |
| Latvia     | —            | 5    | 700  | —     | 41.2 | 37.9 | 233.6 |
| Latvia     | —            | 5    | 700  | —     | 32.9 | 32.7 | 193.6 |
| Latvia     | —            | 5    | 700  | —     | 31.1 | 33.4 | 204.8 |
| Indonesia  | Sulawesi     | 21.3 | 1894 | —     | 35.4 | 23.5 | 299.1 |
| Indonesia  | Sulawesi     | 19.1 | 1975 | —     | 37.1 | 22.7 | 293.4 |
| Indonesia  | Sulawesi     | 17.9 | 1891 | —     | 36.0 | 21.9 | 286.5 |
| Indonesia  | Sulawesi     | 14.1 | 2131 | —     | 46.5 | 22.2 | 306.9 |
| Cambodia   | Kampong Thom | 28   | 1700 | 288   | —    | 6.9  | 59.9  |
| Cambodia   | Kampong Thom | 28   | 1700 | 68    | —    | 16.1 | 213.4 |
| Cambodia   | Kampong Thom | 28   | 1700 | 356   | —    | 23.0 | 273.3 |

|             |                 |      |      |       |      |      |        |
|-------------|-----------------|------|------|-------|------|------|--------|
| New Zealand | —               | 12   | 618  | 625   | 24.3 | —    | 49.4   |
| New Zealand | —               | 12   | 618  | 1250  | 19.3 | —    | 56.8   |
| New Zealand | —               | 12   | 618  | 2500  | 14.8 | —    | 59.9   |
| Indonesia   | West Kalimantan | 26   | 4125 | 500   | 24.7 | 41.4 | 660.0  |
| Indonesia   | West Kalimantan | 26   | 4125 | 503   | 24.6 | 40.3 | 641.0  |
| Indonesia   | West Kalimantan | 26   | 4125 | 550   | 23.4 | 37.8 | 577.0  |
| Indonesia   | West Kalimantan | 26   | 4125 | 521   | 24.1 | 39.6 | 622.0  |
| Peru        | Manaus          | 31   | 2286 | 5093  | —    | 37.6 | 85.4   |
| Peru        | Manaus          | 31   | 2286 | 3827  | —    | 39.0 | 114.6  |
| Peru        | Manaus          | 31   | 2286 | 3620  | —    | 25.1 | 63.4   |
| Peru        | Manaus          | 31   | 2286 | 2263  | —    | 25.8 | 83.5   |
| Cameroon    | —               | 25   | 2875 | 453   | —    | 33.9 | 557.4  |
| Cameroon    | —               | 25   | 2875 | 728   | —    | 49.7 | 643.2  |
| Cameroon    | —               | 25   | 2875 | 433   | —    | 1.8  | 10.9   |
| Cameroon    | —               | 25   | 2875 | 359   | —    | 1.7  | 8.9    |
| Congo       | Ituri           | 28   | 2000 | 6828  | —    | 40.0 | 611.0  |
| Congo       | Ituri           | 28   | 2000 | 7765  | —    | 36.0 | 460.0  |
| Congo       | Ituri           | 28   | 2000 | 8001  | —    | 33.0 | 422.0  |
| Congo       | Ituri           | 28   | 2000 | 6173  | —    | 33.0 | 421.0  |
| America     | Oregon          | 16   | 1100 | 18177 | 3.7  | 19.5 | 56.0   |
| America     | Oregon          | 16   | 1100 | 864   | 18.0 | 34.0 | 186.0  |
| America     | Oregon          | 16   | 1100 | 3134  | 48.0 | 37.0 | 302.0  |
| America     | Oregon          | 16   | 1100 | 1665  | 62.5 | 47.0 | 437.0  |
| Canada      | Saskatchewan    | 0.4  | 467  | 980   | 20.5 | —    | 245.0  |
| Canada      | Saskatchewan    | 0.4  | 467  | 1190  | 12.9 | —    | 104.2  |
| America     | Maine           | 7.2  | 1070 | 6743  | 9.0  | 42.6 | 165.2  |
| America     | Maine           | 7.2  | 1070 | 6491  | 9.2  | 41.0 | 172.6  |
| America     | Maine           | 7.2  | 1070 | 6779  | 9.1  | 42.0 | 158.4  |
| America     | Maine           | 7.2  | 1070 | 6667  | 9.1  | 41.8 | 165.4  |
| Sakha       | Cherskii        | -7.6 | 210  | 200   | 1.4  | 1.9  | 71.9   |
| Sakha       | Cherskii        | -7.6 | 210  | 4333  | 3.3  | 5.9  | 39.9   |
| Sakha       | Cherskii        | -7.6 | 210  | 14600 | 2.2  | 7.5  | 403.2  |
| Sakha       | Cherskii        | -7.6 | 210  | 21267 | 3.0  | 17.8 | 1027.3 |
| Sakha       | Cherskii        | -7.6 | 210  | 1900  | 6.1  | 8.2  | 424.0  |
| Poland      | —               | 6.4  | 600  | 5521  | 6.4  | 15.0 | 32.9   |
| Poland      | —               | 6.4  | 600  | 3965  | 10.9 | 42.0 | 128.9  |
| Poland      | —               | 6.4  | 600  | 1852  | 15.9 | 41.8 | 117.3  |
| Poland      | —               | 6.4  | 600  | 1110  | 21.3 | 43.8 | 261.9  |
| Poland      | —               | 6.4  | 600  | 574   | 24.6 | 30.5 | 159.4  |

|          |             |      |      |       |      |      |       |
|----------|-------------|------|------|-------|------|------|-------|
| Poland   | —           | 6.4  | 600  | 544   | 30.0 | 42.2 | 253.9 |
| Poland   | —           | 6.4  | 600  | 581   | 29.1 | 41.4 | 223.3 |
| Poland   | —           | 6.4  | 600  | 407   | 34.3 | 42.3 | 293.6 |
| Poland   | —           | 6.4  | 600  | 301   | 37.9 | 36.0 | 250.1 |
| Poland   | —           | 6.4  | 600  | 235   | 42.0 | 35.5 | 261.5 |
| Poland   | —           | 6.4  | 600  | 212   | 46.5 | 37.0 | 277.6 |
| China    | Guitianshan | 15.3 | 1964 | 9274  | —    | 46.0 | 5.6   |
| China    | Guitianshan | 15.3 | 1964 | 15202 | —    | 35.1 | 7.1   |
| China    | Guitianshan | 15.3 | 1964 | 7221  | —    | 33.4 | 6.5   |
| China    | Guitianshan | 15.3 | 1964 | 7513  | —    | 39.1 | 3.2   |
| Portugal | —           | 17   | 2250 | 494   | —    | —    | 128.7 |
| Portugal | —           | 17   | 2250 | 90    | —    | —    | 77.0  |
| Portugal | —           | 17   | 2250 | 90    | —    | —    | 183.6 |
| Zimbabwe | Harare      | 20   | 750  | 816   | —    | —    | 46.2  |

“—” indicates a missing data in the original literature.
